# Supplementary material for: “I’ve Heard of It, Yes, but I Can’t Remember What Exactly It Was”—A Qualitative Study on Awareness, Knowledge, and Use of the UV Index
Source: MDPI journal article supplement (doi:10.3390/ijerph18041615), 2021-02-08
Supplement: s1 [file s1]

**Supplementary material:**

|                                                                         |
|-------------------------------------------------------------------------|
| Interview guide: Questions during the interview addressing the UV index |
|-------------------------------------------------------------------------|

**Question 1:** Have you ever heard of the term UV index?

**Question 2, alternative 1:** What do you understand by the term UV index?

**Question 2, alternative 2:** Do you have any idea, what the term UV index means?

**Question 3:** Do you know which values the UV index can assume?

**Further queries:**

- Which range of values does the UV index have?

**Question 4:** What do you think, what are the maximum values of the UV index in our region in summer?

**Question 5:** What do you think is the value from which sun protection measures are recommended? What is the value from which special protection measures are necessary?

**Question 6:** If you know the current UV index value, does this information influence your behavior on the concerning day?

**Further queries:**

- How does this information influence your behavior?

**Question 7:** To which extent does the awareness of the current UV index value influence your counselling of customers in the pharmacy?

**Question 8:** To which extent do you share your knowledge about UV index with your customers?
